# Supplementary material for: Photo-Responsivity Improvement of Photo-Mobile Polymers Actuators Based on a Novel LCs/Azobenzene Copolymer and ZnO Nanoparticles Network
Source: MDPI journal article supplement (doi:10.3390/nano11123320), 2021-12-07
Supplement: s1 [file s1]

## Supplementary Materials

# Photo-responsivity Improvement of Photo-Mobile Polymers Actuators Based on a Novel LCs/Azobenzene Copolymer and ZnO Nanoparticles Network

Domenico Sagnelli <sup>1,\*</sup>, Marcella Calabrese <sup>1,7</sup>, Olga Kaczmarczyk <sup>1,2</sup>, Massimo Rippa <sup>1</sup>, Ambra Vestri <sup>1</sup>, Valentina Marchesano <sup>1</sup>, Kristoffer Kortsen <sup>3</sup>, Valentina Cuzzucoli Crucitti <sup>4</sup>, Fulvia Villani <sup>5</sup>, Fausta Loffredo <sup>5</sup>, Carmela Borriello <sup>5</sup>, Giuseppe Nenna <sup>5,\*</sup>, Mariacristina Cocca <sup>6</sup>, Veronica Ambrogi <sup>7</sup>, Katarzyna Matczyszyn <sup>2</sup>, Francesco Simoni <sup>1</sup> and Lucia Petti <sup>1,\*</sup>

- <sup>1</sup> Institute of Applied Sciences and Intelligent Systems of CNR, 80072 Pozzuoli, Italy; marcellacalabrese.97@libero.it (M.C.); olga.kaczmarczyk@pwr.edu.pl (O.K.); massimo.rippa@isasi.cnr.it (M.R.); ambra.vestri@isasi.cnr.it (A.V.); valentina.marchesano@isasi.cnr.it (V.M.); f.simoni@photomat.it (F.S.)
- <sup>2</sup> Advanced Materials Engineering and Modelling Group, Faculty of Chemistry, Wrocław University of Science and Technology, Wybrzeże Wyspiańskiego 27, 50-370 Wrocław, Poland; katarzyna.matczyszyn@pwr.edu.pl
- <sup>3</sup> School of Chemistry, University of Nottingham, University Park, Nottingham NG7 2RD, UK; Kristoffer.kortsen@nottingham.ac.uk (K.K.);
- <sup>4</sup> Department of Chemical and Environmental Engineering, University of Nottingham, University Park, Nottingham NG7 2RD, UK; valentina.cuzzucolicrucitti1@nottingham.ac.uk (V.C.C.)
- <sup>5</sup> ENEA, Italian National Agency for New Technologies, Energy and Sustainable Economic Development, Portici Research Centre, Portici, I-80055 Naples, Italy; fulvia.villani@enea.it (F.V.); fausta.loffredo@enea.it (F.L.); carmela.borriello@enea.it (C.B.)
- <sup>6</sup> Institute for Polymers, Composites and Biomaterials of CNR, 80072 Pozzuoli, Italy; mariacristina.cocca@ipcb.cnr.it
- <sup>7</sup> Department of Chemical, Materials and Production Engineering, University of Naples Federico II, 80125 Naples, Italy; veronica.ambrogi@unina.it
- \* Correspondence: domenico.sagnelli@isasi.cnr.it (D.S.); Giuseppe.nenna@enea.it (G.N.); lucia.petti@isasi.cnr.it (L.P.)

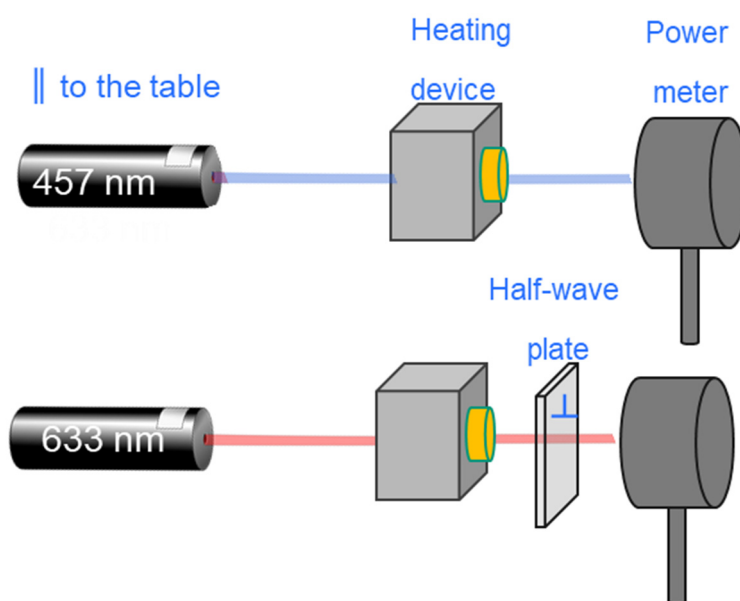

**Figure S1.** Setup for the measurement of transmitted light and birefringence.



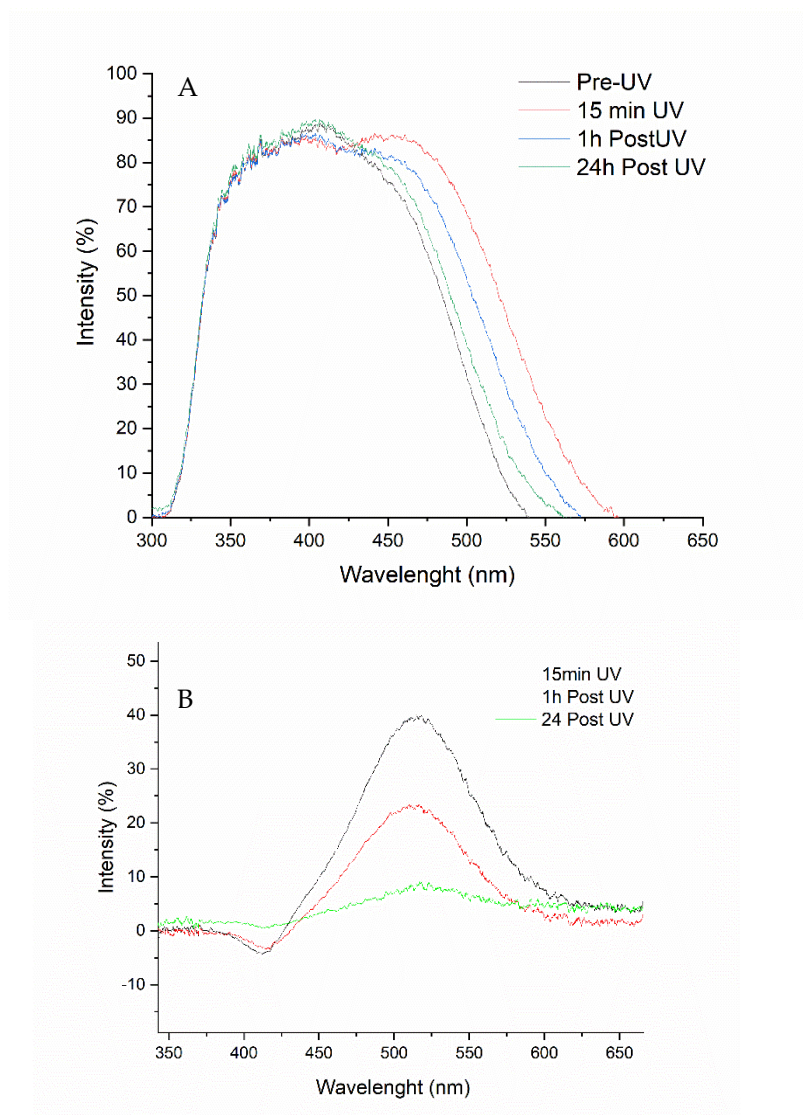

**Figure S3.** (A) Absorbance of the azobenzene moieties embedded in the PMP, obtained by subtracting the contribution of the other elements in the PMP (B) Absorbance of azobenzene moieties in *trans* post irradiation, obtained subtracting the absorbance of the PMP pre-UV.

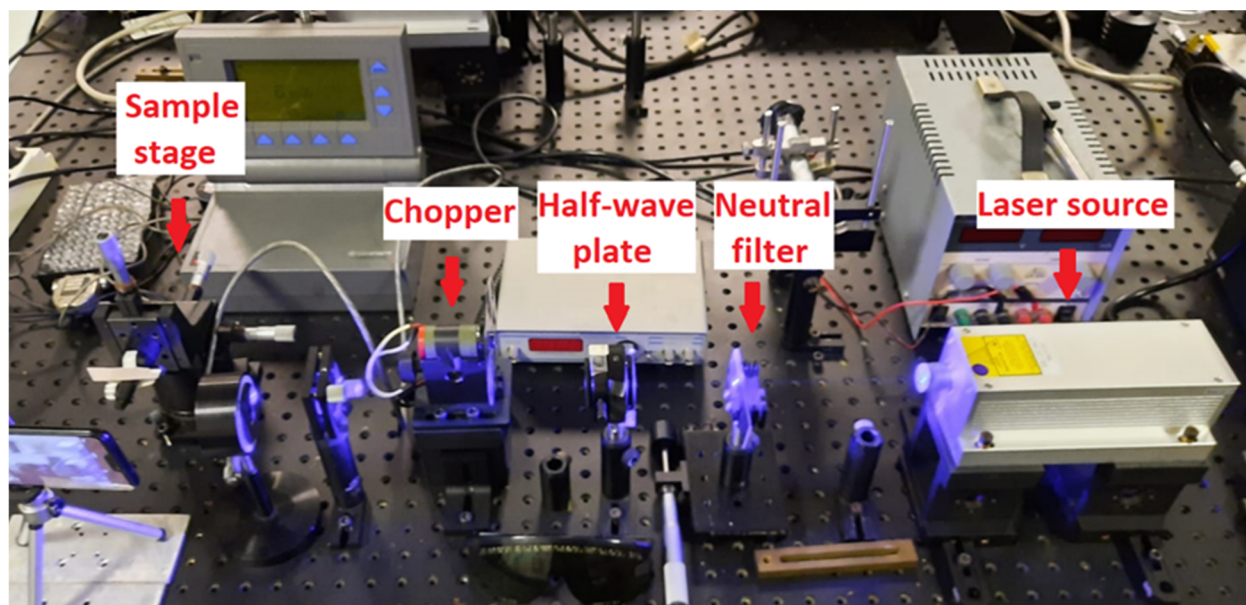

**Figure S4.** Setup for characterization of PMPs light response.

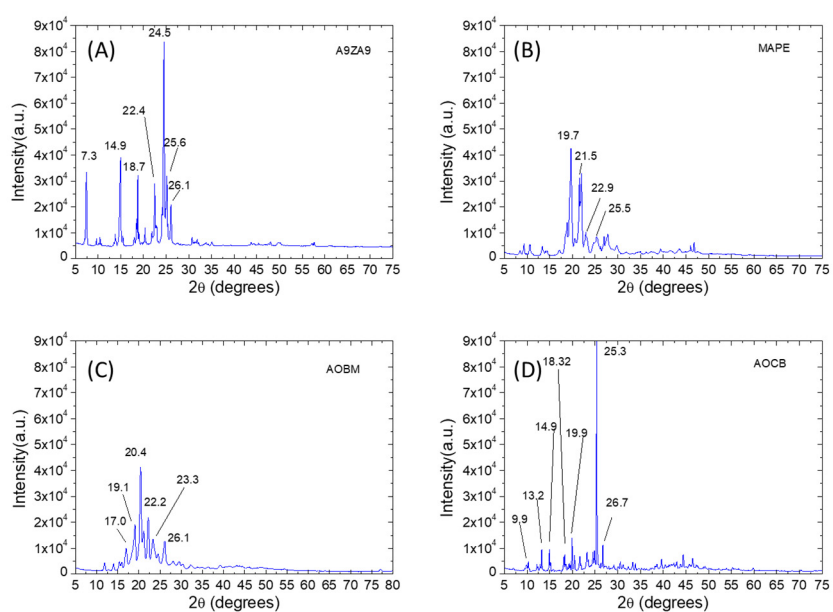

**Figure S5.** X-ray diffraction patterns (Cu K $\alpha$ ) of the starting monomer powders. (A) A9ZA9, (B) MAPE, (C) AOBM, (D) AOGB.

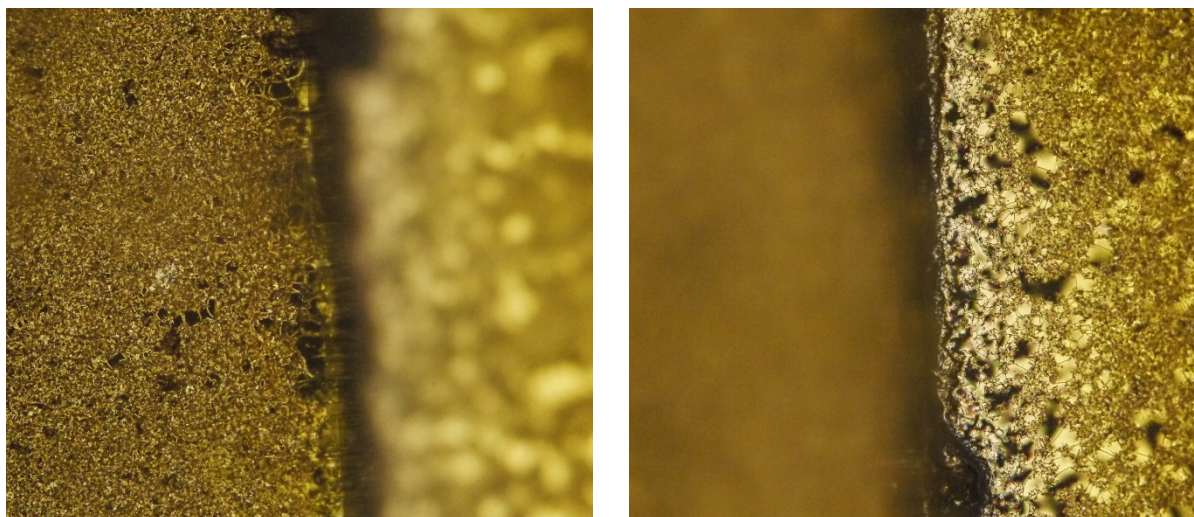

**Figure S6.** Picture of melted monomer penetrated in the cell (**left**) and outside the cell (**right**). In both the pictures it is possible to see trails formed by the interaction of nanoparticles and LCs. Objective 10x.

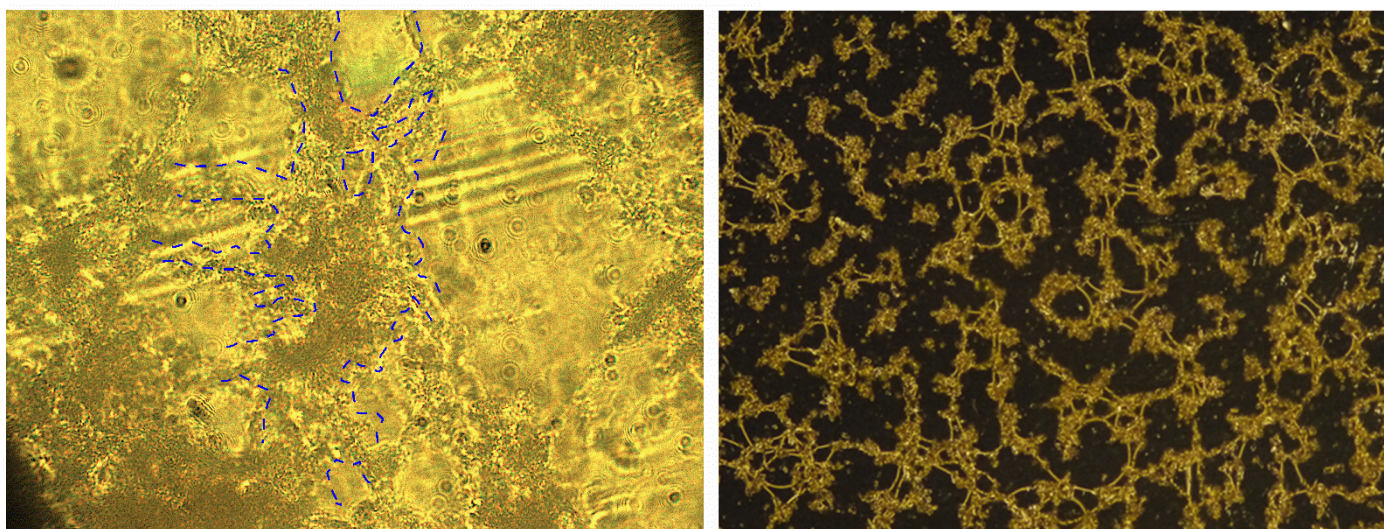

**Figure S7.** Aggregates and trails formed by nanoparticles. On the **left** a closeup picture (100x) of a cell-like structure in a Azo-LC-PMP(6%-Z) and on the **right** a Azo-LC-PMP (1%-ZnO) mixture showing the aggregates and trails (10x).

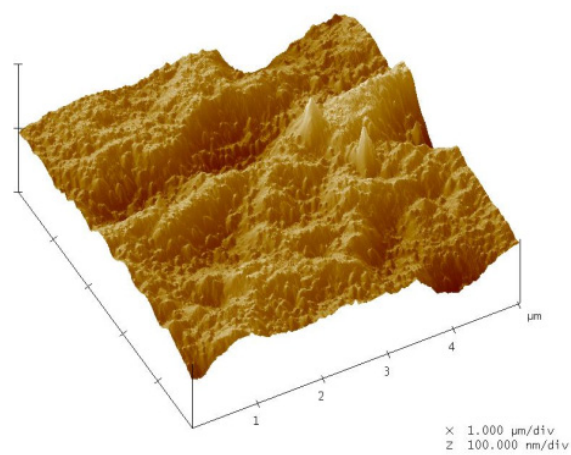

**Figure S8.** 3D-topography AFM image of ZnO-doped PMP film detected by scanning  $5 \times 5 \mu\text{m}^2$ -sized area.

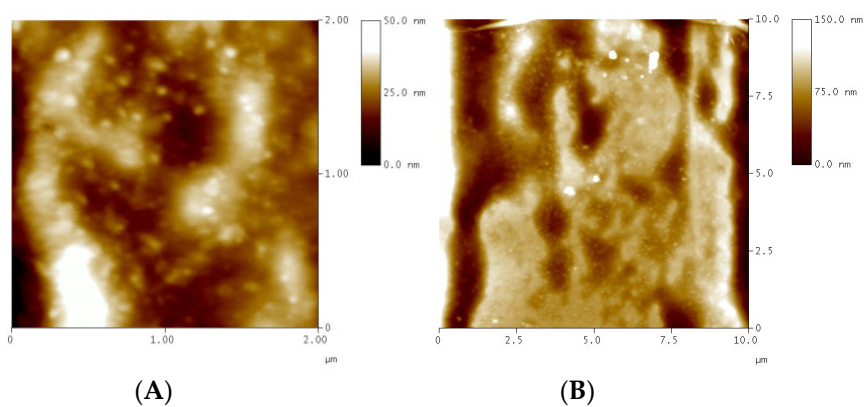

**Figure S9.** Topography AFM images of ZnO-doped PMP film detected by scanning  $2 \times 2 \mu\text{m}^2$  (A) and  $10 \times 10 \mu\text{m}^2$  (B) - sized areas.

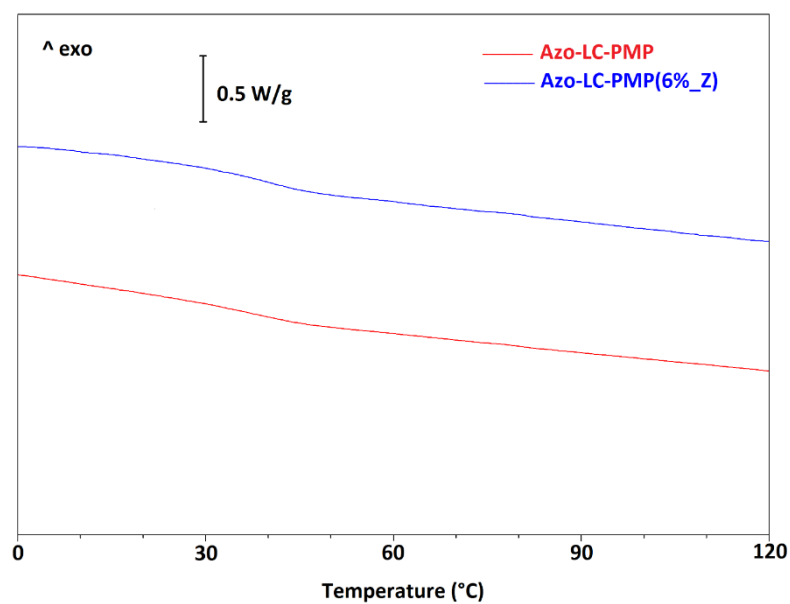

**Figure S10.** DSC Thermograms of Azo-LC-PMP and ZnO composite scans.

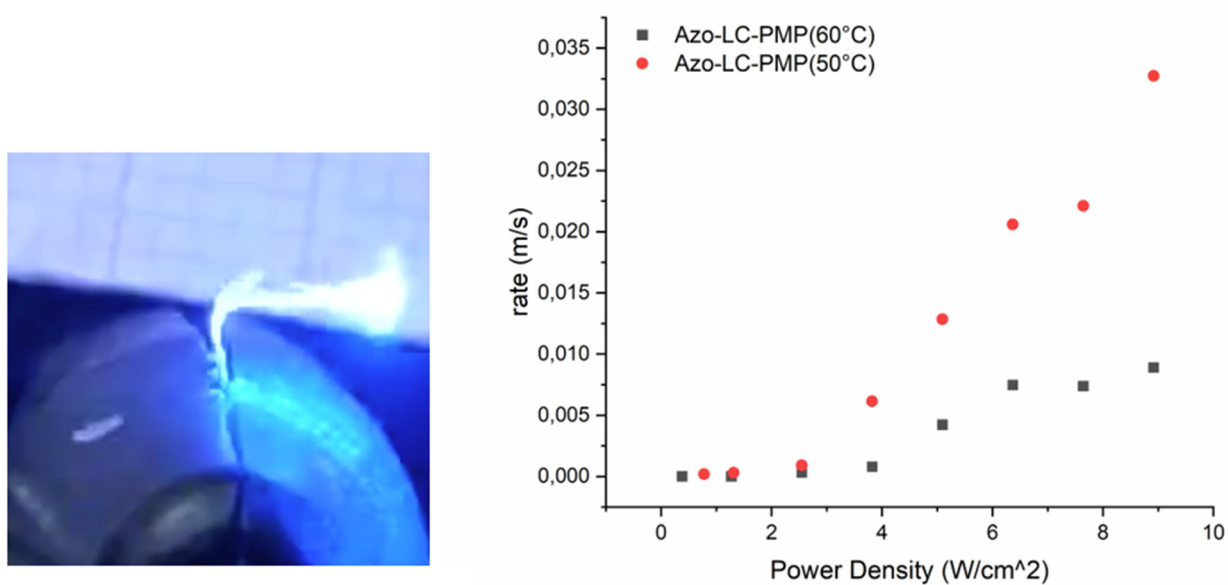

**Figure S11.** (left) Self-Oscillating Azo-LC-PMP without ZnO nanoparticles (right) Bending speed (m/s) of Azo-LC- PMP Z polymerized at 50 °C and 60 °C. Showing the improved performance of the film when polymerized at the nematic temperature.
